# Supplementary material for: Adapting a self-affirmation intervention for use in a mobile application for smokers
Source: Springer Nature journal article supplement (doi:10.1007/s10865-019-00028-1), 2019-03-22
Supplement: MOESM1 [file 16571990]

**Adapting a Self-Affirmation Intervention for Use in a Mobile Application:**
**Smokers who Self-Affirm Report Greater Intentions to Smoke**

**Electronic Supplementary Material**

**Appendix A: Health Information Sheet Text**

***Health Effects Information Sheet***
 
**Smoking and Health**
Many people realize that smoking is harmful for their health.  However, few people have heard just how bad it can be.  According to the U.S. Centers for Disease Control, cigarette smoking is the most common cause of early death in the U.S.  It causes almost half a million deaths each year. More than 10 times as many U.S. citizens have died early from cigarette smoking than have died in all the wars fought by the U.S.  About half of all smokers will die from diseases caused by their smoking.
  
**Not Just Lung Cancer**
People who smoke are 25 times more likely to get lung cancer than people who do not smoke.  Lung cancer and emphysema are the most well-known diseases caused by smoking.  However, they are not the only health problems people should know about.  In 2014, the U.S. Surgeon General reviewed over 50 years of research on smoking.  Smoking doubles a person’s chances of getting heart disease or having a stroke, and raises the chances of getting diabetes by 40%.  Smoking can also cause cancer almost anywhere in the body, including the colon, stomach, throat, mouth, bladder, and blood.  Smoking can cause tooth loss and eye problems such as cataracts.  Cataracts are when the lens in the eye gets cloudy and makes it hard to see.  Smoking also causes problems with men’s sperm and makes it harder for women to get pregnant.
  
**No Amount is Safe**
People who smoke more cigarettes for a longer period of time are more likely to have health problems.  However, Dr. Francis Collins from the National Cancer Institute recently wrote, “There’s no safe amount of smoking.” Smoking even 1 to 4 cigarettes a day raises the chances of early death from diseases like heart disease, stroke, lung cancer, and chronic obstructive pulmonary disease (COPD) compared to people who do not smoke.  This is because the harmful chemicals in tobacco smoke reach the lungs quickly with every puff.  The blood carries the chemicals to every organ in the body.
  
**Quit Now**
It is important to know that quitting at any age and at any time can improve health.  It’s never too late to quit, even for people who are 50, 60, or 70 years old!  But the sooner people quit, the better off they will be.  Why?  Quitting smoking cuts the risk of having health problems.  Just 1 year after quitting smoking, the risk for a heart attack is much lower.  Within 2 to 5 years after quitting smoking, the risk for stroke may be the same as someone who has never smoked.  Within 5 years, the risks for cancers of the mouth, throat, esophagus, and bladder drop by half.  Ten years after people quit smoking, their risk for lung cancer drops by half.
 People who want more information about quitting should talk to their doctor, call 1-800-QUIT-NOW, or go to www.smokefree.gov.

**Appendix B: Full Text of Self-affirmation instructions**

*Note*: Each condition includes one of the 10 questions as an example of the instructions given for the individual items. Instructions for conditions 1 and 4 include all 10 questions for the Kindness Questionnaire and Personal Opinion Survey, respectively. Response options for all questions were yes/no.

**Condition 1: Kindness Questionnaire, Written Examples**

The first questions are about your level of kindness toward others. The questions are about behaviors that **YOU** have done for other people. As you read each question, try to think of a specific time when **YOU** did the behavior for another person. There are no right or wrong answers, so please be as honest as possible. Mark the answer that best describes **YOUR** behavior toward other people. If you answer **YES** to any of the questions, please spend a few moments writing about a specific example of a time when you did the behavior described in the question.

1. Have you ever forgiven another person when they have hurt you?
   1. Yes
   2. No

IF YES, WRITE ABOUT A SPECIFIC EXAMPLE:

1. Have you ever been considerate of another person's feelings?
2. Have you ever been concerned with the happiness of another person?
3. Have you ever looked out for another person's interests before your own?
4. Have you ever been generous and selfless to another person?
5. Have you ever attended to the needs of another person?
6. Have you ever tried not to hurt the feelings of another person?
7. Have you ever felt satisfied when you've helped another person?
8. Have you ever gone out of your way to help a friend even at the expense of your own happiness?
9. Have you ever found ways to help another person who was less fortunate than yourself?

**Condition 2: Kindness Questionnaire, Imagined Examples**

The first questions are about your level of kindness toward others. The questions are about behaviors that YOU have done for other people. As you read each question, try to think of a specific time when YOU did the behavior for another person. There are no right or wrong answers, so please be as honest as possible. Mark the answer that best describes YOUR behavior toward other people. If you answer YES to any of the questions, please spend a few moments thinking about a specific example of a time when you did the behavior in the question. Make sure that you think about the specific example at the same level of detail that you would if we asked you to write it down.

1. Have you ever forgiven another person when they have hurt you?
2. Yes
3. No

IF YES, THINK ABOUT A SPECIFIC EXAMPLE.

**Condition 3: Kindness Questionnaire, No Examples**

The first questions are about your level of kindness toward others. The questions are about behaviors that YOU have done for other people. As you read each question, try to think of a specific time when YOU did the behavior for another person. There are no right or wrong answers, so please be as honest as possible. Mark the answer that best describes YOUR behavior toward other people.

1. Have you ever forgiven another person when they have hurt you?
   1. Yes
   2. No

**Condition 4: Personal Opinion Survey, Written Examples**

The first questions are about your personal opinions. The questions are about **YOUR**opinions on each topic. As you read each question, try to think about why your opinion is what it is. There are no right or wrong answers, so please be as honest as possible. Mark the answer that best describes **YOUR**opinion. If you answer **YES**to any of the questions, please spend a few moments typing a specific reason why you hold that opinion.

1. I think that the color blue looks great on most people.
   1. Yes
   2. No

IF YES, WRITE A SPECIFIC REASON WHY:

1. I think that chocolate is the best flavor of ice cream.
2. I think that winter is the best season of the year.
3. I think that the best-smelling trees in the world are pine trees.
4. I think that cooking is an important skill to have.
5. I think that house plants brighten a home.
6. I think that sewing is an important skill to possess.
7. I think that the beach would be a great place to vacation.
8. I think that the bus is the best form of public transportation.
9. I think that fruit is the best dessert.

**Condition 5: Personal Opinion Survey, Imagined Examples**

The first questions are about your personal opinions. The questions are about **YOUR**opinions on each topic. As you read each question, try to think about why your opinion is what it is. There are no right or wrong answers, so please be as honest as possible. Mark the answer that best describes **YOUR**opinion. If you answer **YES**to any of the questions, please spend a few moments thinking about a specific reason why you hold that opinion. Make sure that you think about the specific reason at the same level of detail that you would if we asked you to write it down.

1. I think that the color blue looks great on most people.
   1. Yes
   2. No

 IF YES, THINK ABOUT A SPECIFIC REASON WHY.

**Condition 6: Personal Opinion Survey, No Examples**

The first questions are about your personal opinions. The questions are about **YOUR**opinions on each topic. As you read each question, try to think about why your opinion is what it is. There are no right or wrong answers, so please be as honest as possible. Mark the answer that best describes **YOUR**opinion.

1. I think that the color blue looks great on most people.
   1. Yes
   2. No

**Appendix C: Procedure for coding responses and coding scheme for qualitative self-affirmation examples**

**Procedure for coding responses**

First, J.T. reviewed a subset of responses then developed an initial codebook, which was then revised through discussion. Next, J.T. and E.W. independently coded approximately 10% of the data. Disagreements were resolved through discussion and consultation with A.M., and the codebook was revised again. J.T. and E.W. then independently coded another 10% of the data, achieving 92.5% agreement. Discrepancies were resolved through discussion. After establishing reliability, the primary coders each coded half of the remaining responses.

**Coding Scheme**

| 1. **Whether provided a written example** | | | |
| --- | --- | --- | --- |
| **Instructions**: Participants were first asked 10 yes/no questions about whether they had ever engaged in specific acts of kindness. If they responded yes, they were asked to write an example. We are coding for the presence of written responses that can be considered examples. Do not consider spelling or grammar when coding. “Reasonable” inferences are okay, but don’t go overboard. | | | |
| **1a. Does not count** | Give this code if any of the following are met: | **Example responses (all taken from question about forgiving: Have you ever forgiven another person when they have hurt you?)** |
|  | - - - -99 (system missing, did not write anything) |  |
|  | - - - Don’t know, can’t think of an example, refusal, or nonsensical response (e.g., random letters/words)     - Uninterpretable (response does not make sense as an answer to the specific question asked)     - DO NOT USE this category for responses that aren't really great answers but still seem more relevant to the topic at hand | - - - “I’d rather not”     - “I don’t know     - “I think so”     - “too long ago to remember”     - “make me happy”     - “Learned to grow”     - DOES NOT COUNT IN THIS CATEGORY: “I tell everyone this is because of my genetic make up LOL” |

| **1b. Minimal example** | Give this code if any of the following are met: |  |
| --- | --- | --- |
|  | - - - Affirmed that they have engaged in the behavior but don’t provide an example | - - - “Everyday every year all the time”     - “always do”     - “sometimes”     - “Of course” |
|  | - - - One word response does not provide detail. | - - - Abuse     - Breakup     - Cheated |
|  | - - - No target, example, or elaboration (included but not limited to responses that are very vague or suggest a general personality or tendency, or occupation/role) | - - - “Even though I shouldn’t”     - “Everyone should”     - “Because I need to”     - “A lot of people”     - “Forgave but didn’t forget”     - “I’m a wife”     - “The golden rule applied”     - “I forgave for my own sanity”     - “Yes need to in sales” |
|  | - Mentions target but does not provide a specific situation | - “an ex boyfriend. No example. :)” - “My sister are all bacjstabers (sic)” - “My father,myself” - “Yes. Friends and family. I forgive them.” |
| **1c. Moderate-to-full example** | Give this code if none of the previous codes apply and at least one of the following are met: |  |
|  | - Clear, specific example that may include both the target and the situation | - “My nephew stole money from me and I forgave him for it.” - “When my ex cheated on me I forgave her and tried to make the relationship work.” |
|  | - Does not provide a specific example but provides some elaboration or context about the situation or condition | - “When I've been used and lied to” - “I’ve had my feelings hurt and I have forgiven the people that have done it because I love them and I’m better” - “All the time! Something someone did or said, I just let it go for the sake of the friendship.” |

**Appendix D: Detailed description of moderator analyses**

We used ANOVAs to test whether education, race, survey completion mode, and the dichotomous risk level measure moderated the effect of the intervention on the four primary dependent variables. We describe the 3 of 16 potential interactions that reached statistical significance.

*Education* and *survey completion* *mode* significantly interacted with self-affirmation condition to predict intentions to quit smoking (Education: *F*(1, 591)=5.92, *p*=.015, *η*2*p*=.01; Mode: *F*(1, 591)=4.04, *p*=.045, *η*2*p*=.007). Specifically, self-affirmation was associated with lower intentions a) for those with a college education (Self-affirmation: *M*=2.20, *SD*=0.90; Control: *M*=2.56, *SD*=1.02; *p*<.001) but not for those with no college experience (Self-affirmation: *M*=2.40, *SD*=1.00; Control: *M*=2.35, *SD*=0.94; *p*=.743), and b) for those who completed the study on a tablet or PC (Self-affirmation: *M*=1.96, *SD*=0.82; Control: *M*=2.56, *SD*=1.03; *p*=.006) but not for those who completed the study on a phone (Self-affirmation: *M*=2.31, *SD*=0.95; Control: *M*=2.47, *SD*=0.99; *p*=.059).

*Survey completion**mode* significantly interacted with Example Type to predict perceived message effectiveness (*F*(2, 591)=5.78, *p*=.003,  *η*2*p*=.019). Specifically, participants who were not asked to provide examples reported lower perceived effectiveness if they completed the survey on a Tablet or PC (*M*=2.80, *SD*=0.73) than if they completed the survey on a phone (*M*=3.17, *SD*=0.71, *p*=.035). In contrast, participants who wrote examples or imagined examples reported higher perceived effectiveness if they completed the study on a Tablet or PC versus on a phone (Written examples: Tablet or PC, *M*=3.38, *SD*=0.51; phone, *M*=3.04, *SD*=0.77; *p*=.040; Imagined examples: Tablet or PC, *M*=3.47, *SD*=0.63; phone, *M*=3.12, *SD*=0.72; *p*=.032).

**Appendix E: Results of intent-to-treat ANOVAs among the full sample of 900 eligible respondents.**

We conducted ANOVAs among the full sample of 900 eligible respondents. Consistent with primary analyses, those who self-affirmed reported somewhat lower intentions (Self-affirm: *M*=2.38, *SD*=0.95; Control: *M*=2.49, *SD*=1.01, *F*(1,885)=3.24, *p*=.072, *η*2*p*=.004) and lower perceived cognitive risk (Self-affirm: *M*=-0.07, *SD*=0.89; Control: *M*=0.10, *SD*=0.91, *F*(1,815)=7.17, *p*=.008, *η*2*p*=.009) and feelings of risk (Self-affirm: *M*=-0.10, *SD*=0.91; Control: *M*=0.12, *SD*=0.89, *F*(1,818)=11.86, *p*=.001, *η*2*p*=.014) than those in the control conditions. However, there were two new significant effects. First, there was a significant Self-affirmation by Example Type interaction for reactance (*F*(2,873)=4.93, *p*=.007, *η*2*p*=.011) such that participants who imagined self-affirmation examples reported greater reactance (*M*=2.11, *SE*=0.07) than those who imagined control examples (*M*=1.83, *SE*=0.07, *p*=.004), with no differences as a function of Self-affirmation condition for participants who wrote examples (*p*=.350) or did not provide examples (*p*=.325). There was also a main effect of affirmation on perceived severity, such that severity was lower in the self-affirmation condition (*M*=3.25, *SD*=0.71) than the control condition (*M*=3.35, *SD*=0.70, *F*(1,884)=4.34, *p*=.038, *η*2*p*=.005).

Electronic Supplementary Material Figure 1. CONSORT flow of participation


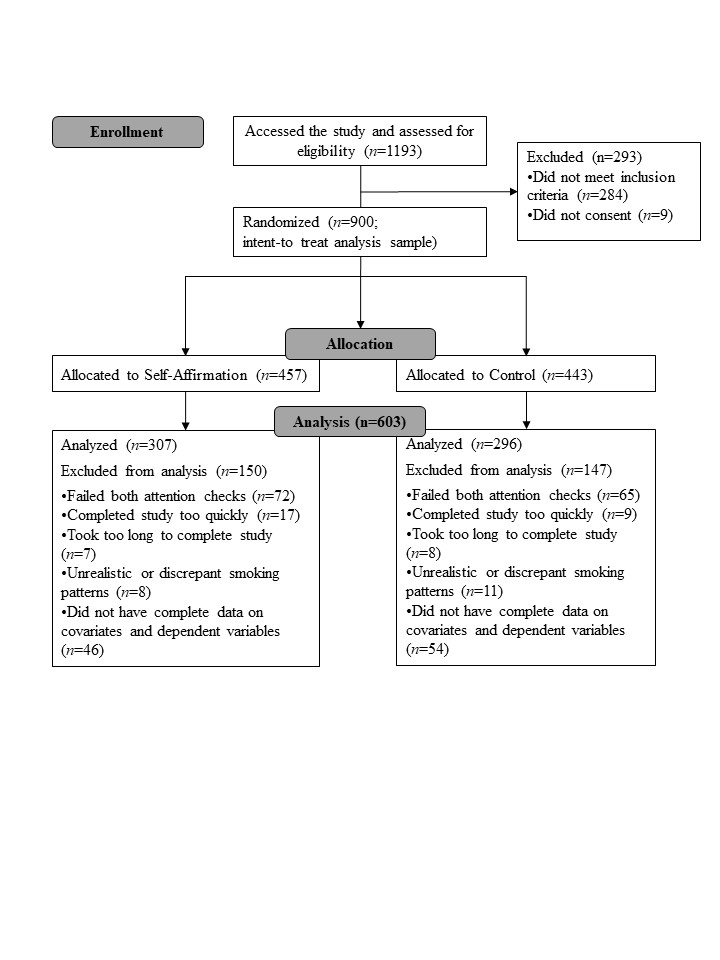


Electronic Supplementary Material Table 1. Comparison of the participants who were excluded versus included in analyses on demographic and smoking factors, primary and secondary dependent variables, and feasibility metrics.

| Variable | Excluded, *n*=297, M (*SD*) | Included, *n*=603, M (*SD*) | *t*-test statistics and  *p* values |
| --- | --- | --- | --- |
| Age | 35.51 (10.09) | 37.52 (10.19) | *t*(898)=-2.78, *p*=.005 |
| Number of quit attempts | 3.98 (6.53) | 3.40 (4.44) | *t*(420)=1.37, *p*=.170 |
| Message acceptance | 3.28 (0.74) | 3.57 (0.57) | *t*(459)=-5.94, *p*<.001 |
| Message effectiveness | 3.05 (0.77) | 3.12 (0.73) | *t*(891)=-1.34, *p*=.181 |
| Reactance | 2.39 (0.96) | 1.70 (0.67) | *t*(401)=10.77, *p*<.001 |
| Intentions to quit smoking | 2.57 (0.99) | 2.37 (0.97) | *t*(889)=2.82, *p*=.005 |
| Self-efficacy | 2.39 (1.03) | 2.01 (1.01) | *t*(889)=5.20, *p*<.001 |
| Perceived cognitive risk | -0.13 (0.93) | 0.06 (0.89) | *t*(819)=-2.59, *p*=.010 |
| Feelings of risk | -0.16 (0.95) | 0.07 (0.88) | *t*(822)=-3.25, *p*=.001 |
| Response efficacy | 3.16 (0.75) | 3.41 (0.71) | *t*(889)=-4.71, *p*<.001 |
| Anticipated regret | 3.08 (0.81) | 3.36 (0.79) | *t*(889)=-4.91, *p*<.001 |
| Severity | 3.12 (0.79) | 3.39 (0.65) | *t*(481)=-4.99, *p*<.001 |
| Worry | 2.83 (0.90) | 2.99 (0.86) | *t*(888)=-2.57, *p*=.010 |
| Time to complete intervention, in minutes | 2.59 (10.64) | 2.25 (3.20) | *t*(319)=0.53, *p*=.597 |
| Time to read health message, in seconds | 115.21 (815.21) | 60.38 (101.41) | *t*(297)=1.15, *p*=.252 |
| Number of ‘yes’ responses out of 10 possible | 7.21 (2.83) | 7.28 (2.67) | *t*(891)=-0.36, *p*=.720 |
| Number of moderate-to-full (full) written examples out of 10 possible | 2.38 (2.22) | 4.27 (3.13) | *t*(25)=-3.00, *p*=.006 |
| Number of absent written examples out of 10 possible | 4.31 (4.06) | 2.51 (2.77) | *t*(17)=1.72, *p*=.103 |

Electronic Supplementary Table 1 cont.

| Variable | Excluded, *n*=297, *n* (%) | Included,  *n*=603, *n* (%) | Chi-square statistics and *p* values |
| --- | --- | --- | --- |
| Self-affirmation condition | 150 (50.5) | 307 (50.9) | *X2*(1)=0.01, *p*=.944 |
| Example Type condition |  |  | *X2*(2)=2.12, *p*=.346 |
| No examples | 94 (31.6) | 208 (34.5) |  |
| Imagined examples | 110 (37.0) | 194 (32.2) |  |
| Written examples | 93 (31.3) | 201 (33.3) |  |
| Education: Have at least some college experience | 171 (59.4) | 381 (63.2) | *X2*(1)=1.20, *p*=154 |
| Male | 108 (38.3) | 170 (28.2) | *X2*(1)=9.11, *p*=.002 |
| White race | 222 (77.1) | 517 (85.7) | *X2*(1)=10.32, *p*=.002 |
| Non-Hispanic | 259 (89.9) | 553 (91.7) | *X2*(1)=0.76, *p*=.380 |
| Employed | 189 (65.6) | 354 (58.7) | *X2*(1)=3.92, *p*=.056 |
| Income $50,000 or higher | 126 (44.4) | 239 (39.6) | *X2*(1)=1.78, *p*=.189 |
| Completed survey on a phone | 213 (79.8) | 539 (89.4) | *X2*(1)=14.58, *p*<.001 |
| High health literacy | 112 (38.9) | 422 (70.0) | *X2*(1)=78.48, *p*<.001 |
| Smoking risk level1 |  |  | *X2*(3)=3.24, *p*=.356 |
| Nondaily smoker | 44 (15.9) | 80 (13.3) |  |
| Daily smoker: less than 1 pack/day, does not smoke within 30 minutes of waking | 45 (16.2) | 81 (13.4) |  |
| Daily smoker: less than 1 pack/day, smokes within 30 minutes of waking | 101 (36.5) | 251 (41.6) |  |
| Daily smoker: 1 or more packs/day, smokes within 30 minutes of waking | 87 (31.4) | 191 (31.7) |  |

*Note.* The sample size differs across analyses because of missing data among participants excluded from analyses.

1 Only daily smokers were asked whether they smoke within 30 minutes of waking, *n*=757
